# Supplementary figures and images for: Chemoprotection byd-methionine against cisplatin-induced side-effects: insight from in vitro studies using human plasma
Source: Royal Society of Chemistry journal article supplement (doi:10.1039/c3mt00238a), 2013-11-19

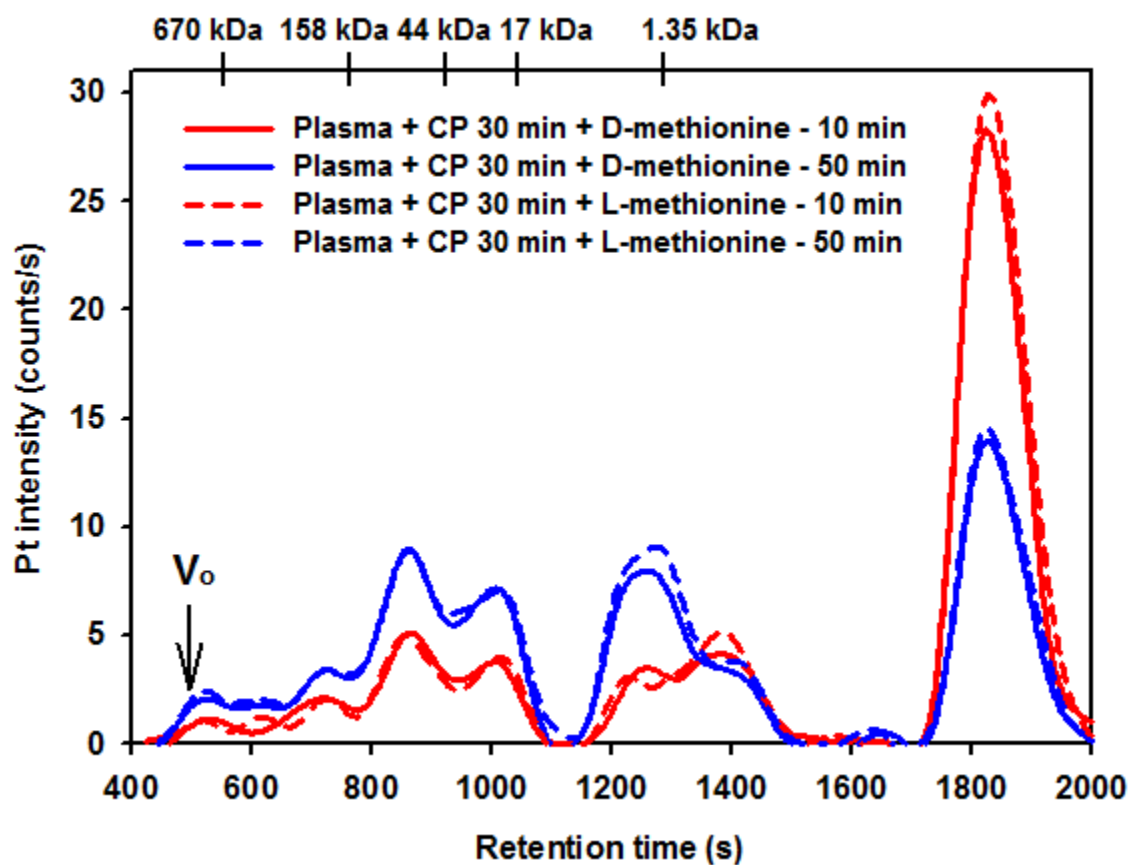

Supplement: c3mt00238a_3.pdf [file c3mt00238a_3.pdf]

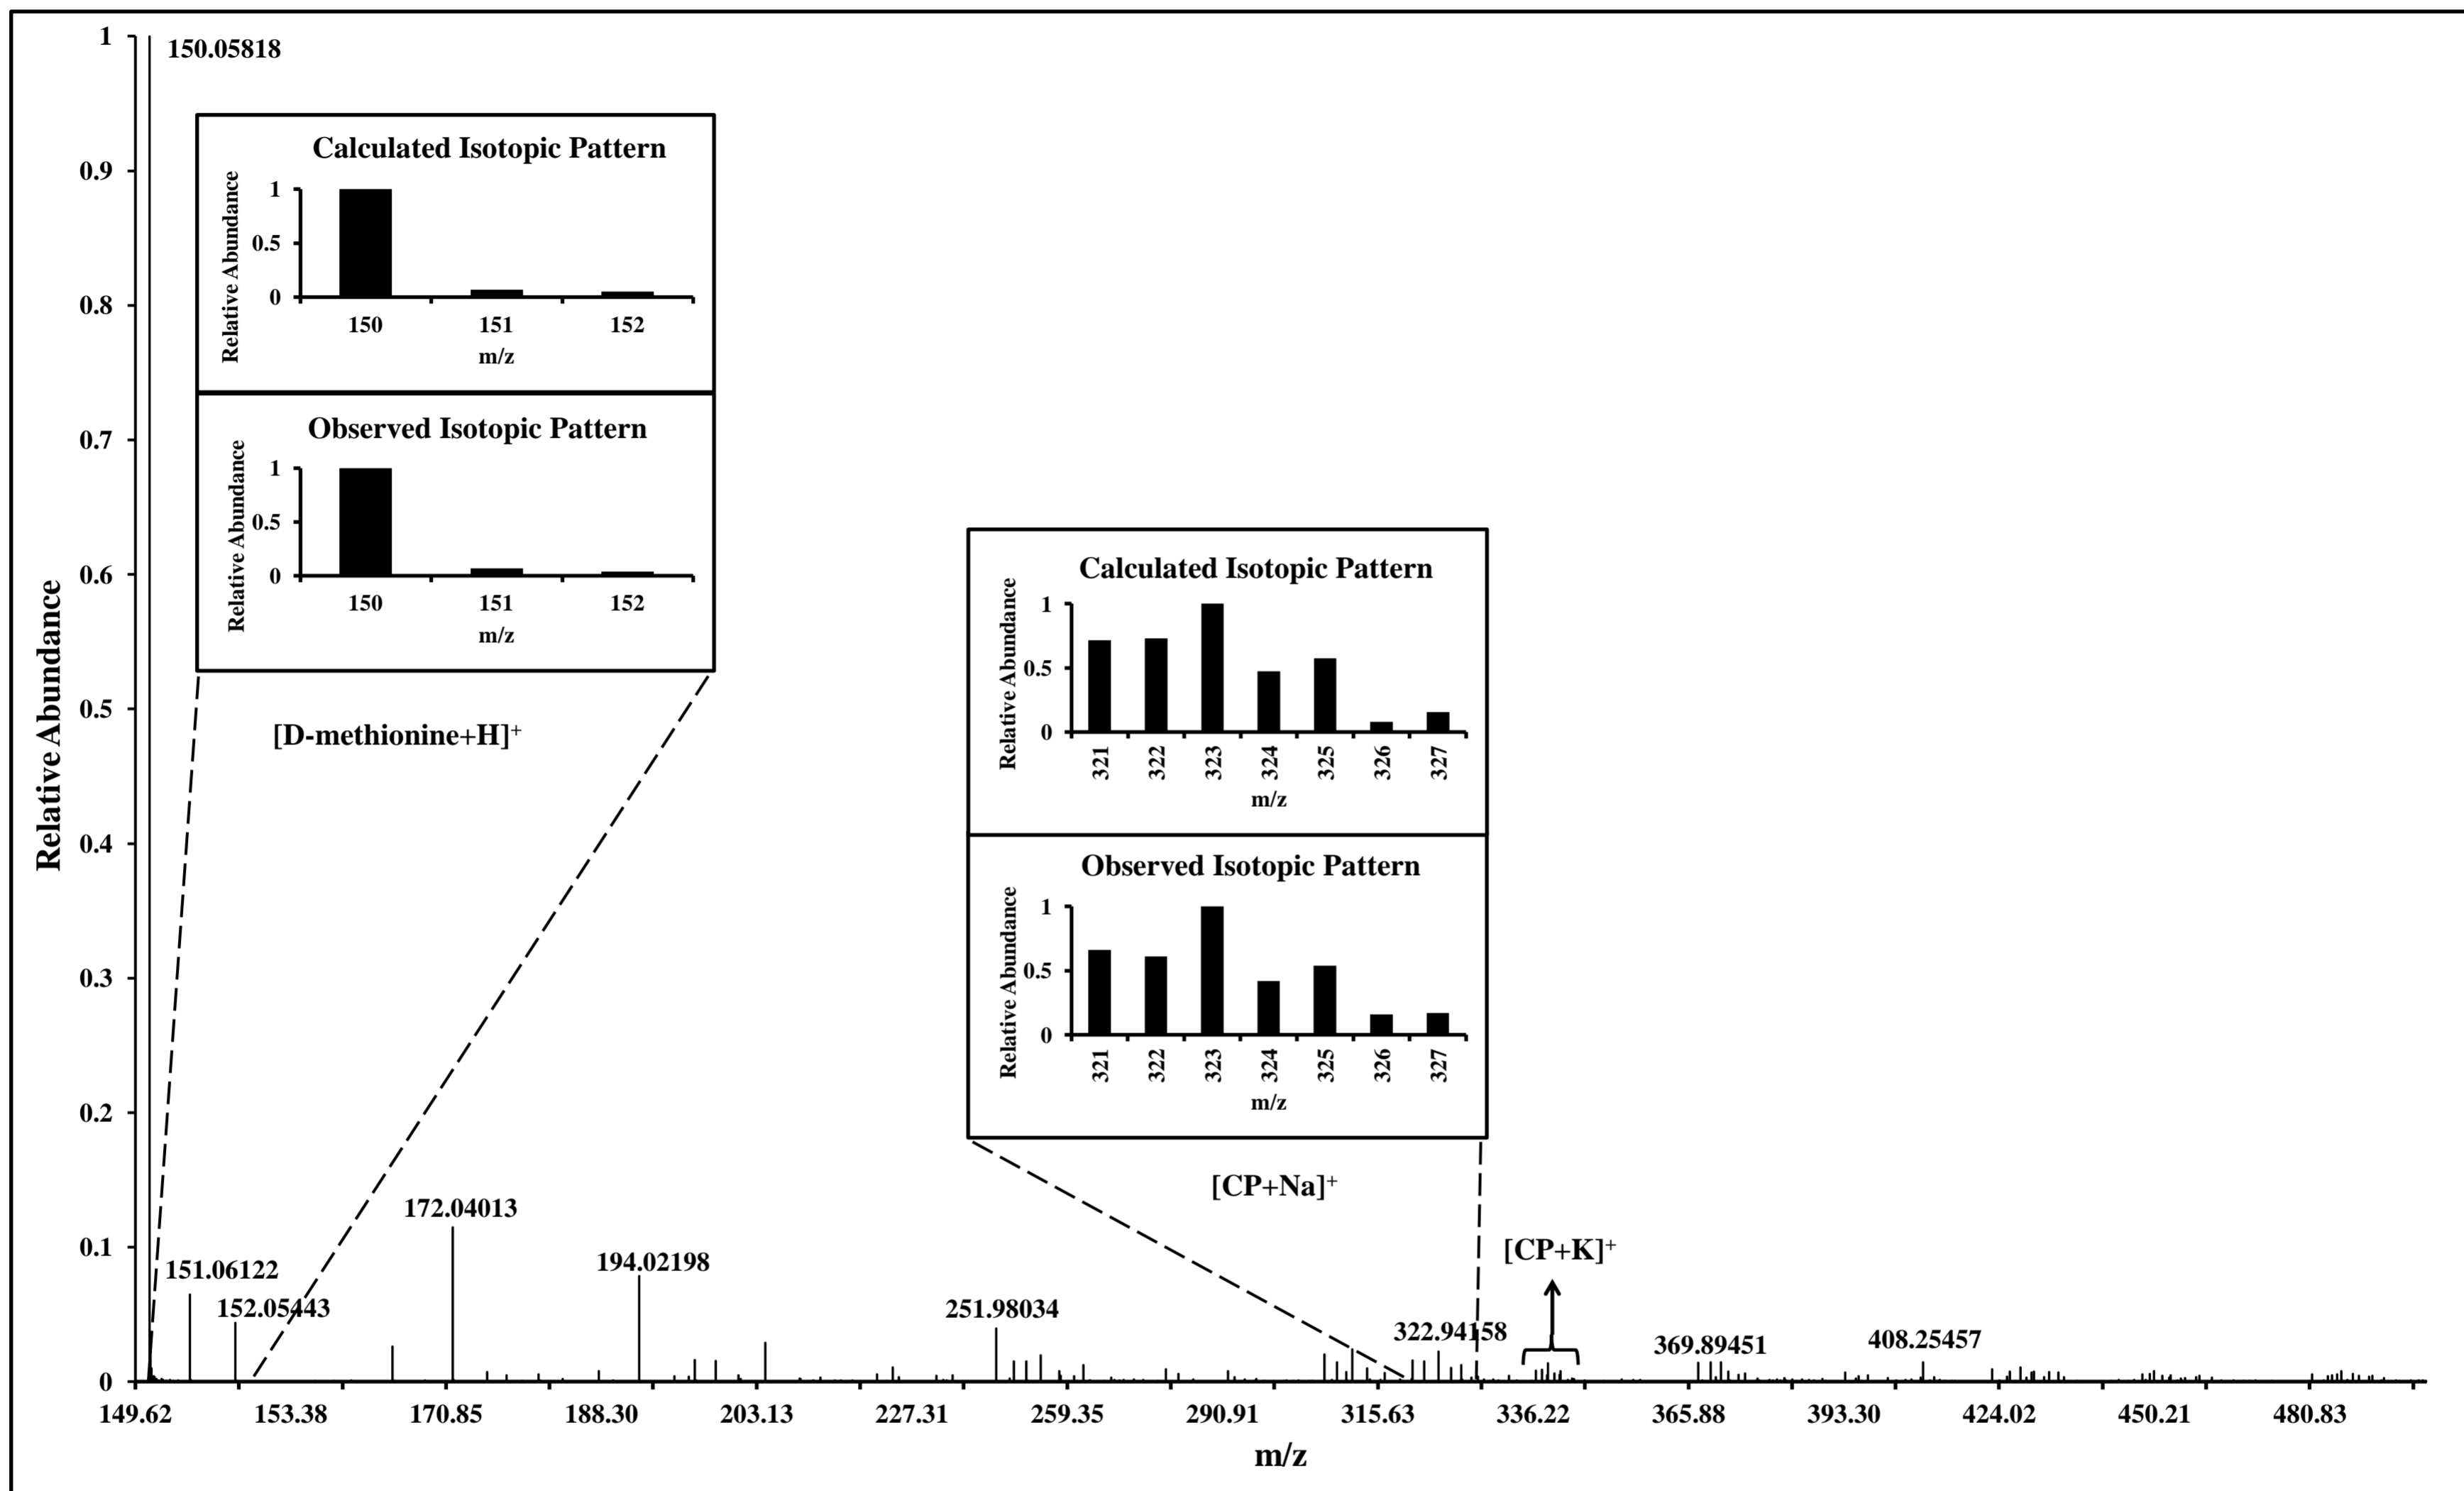

Supplement: c3mt00238a_4.pdf [file c3mt00238a_4.pdf]

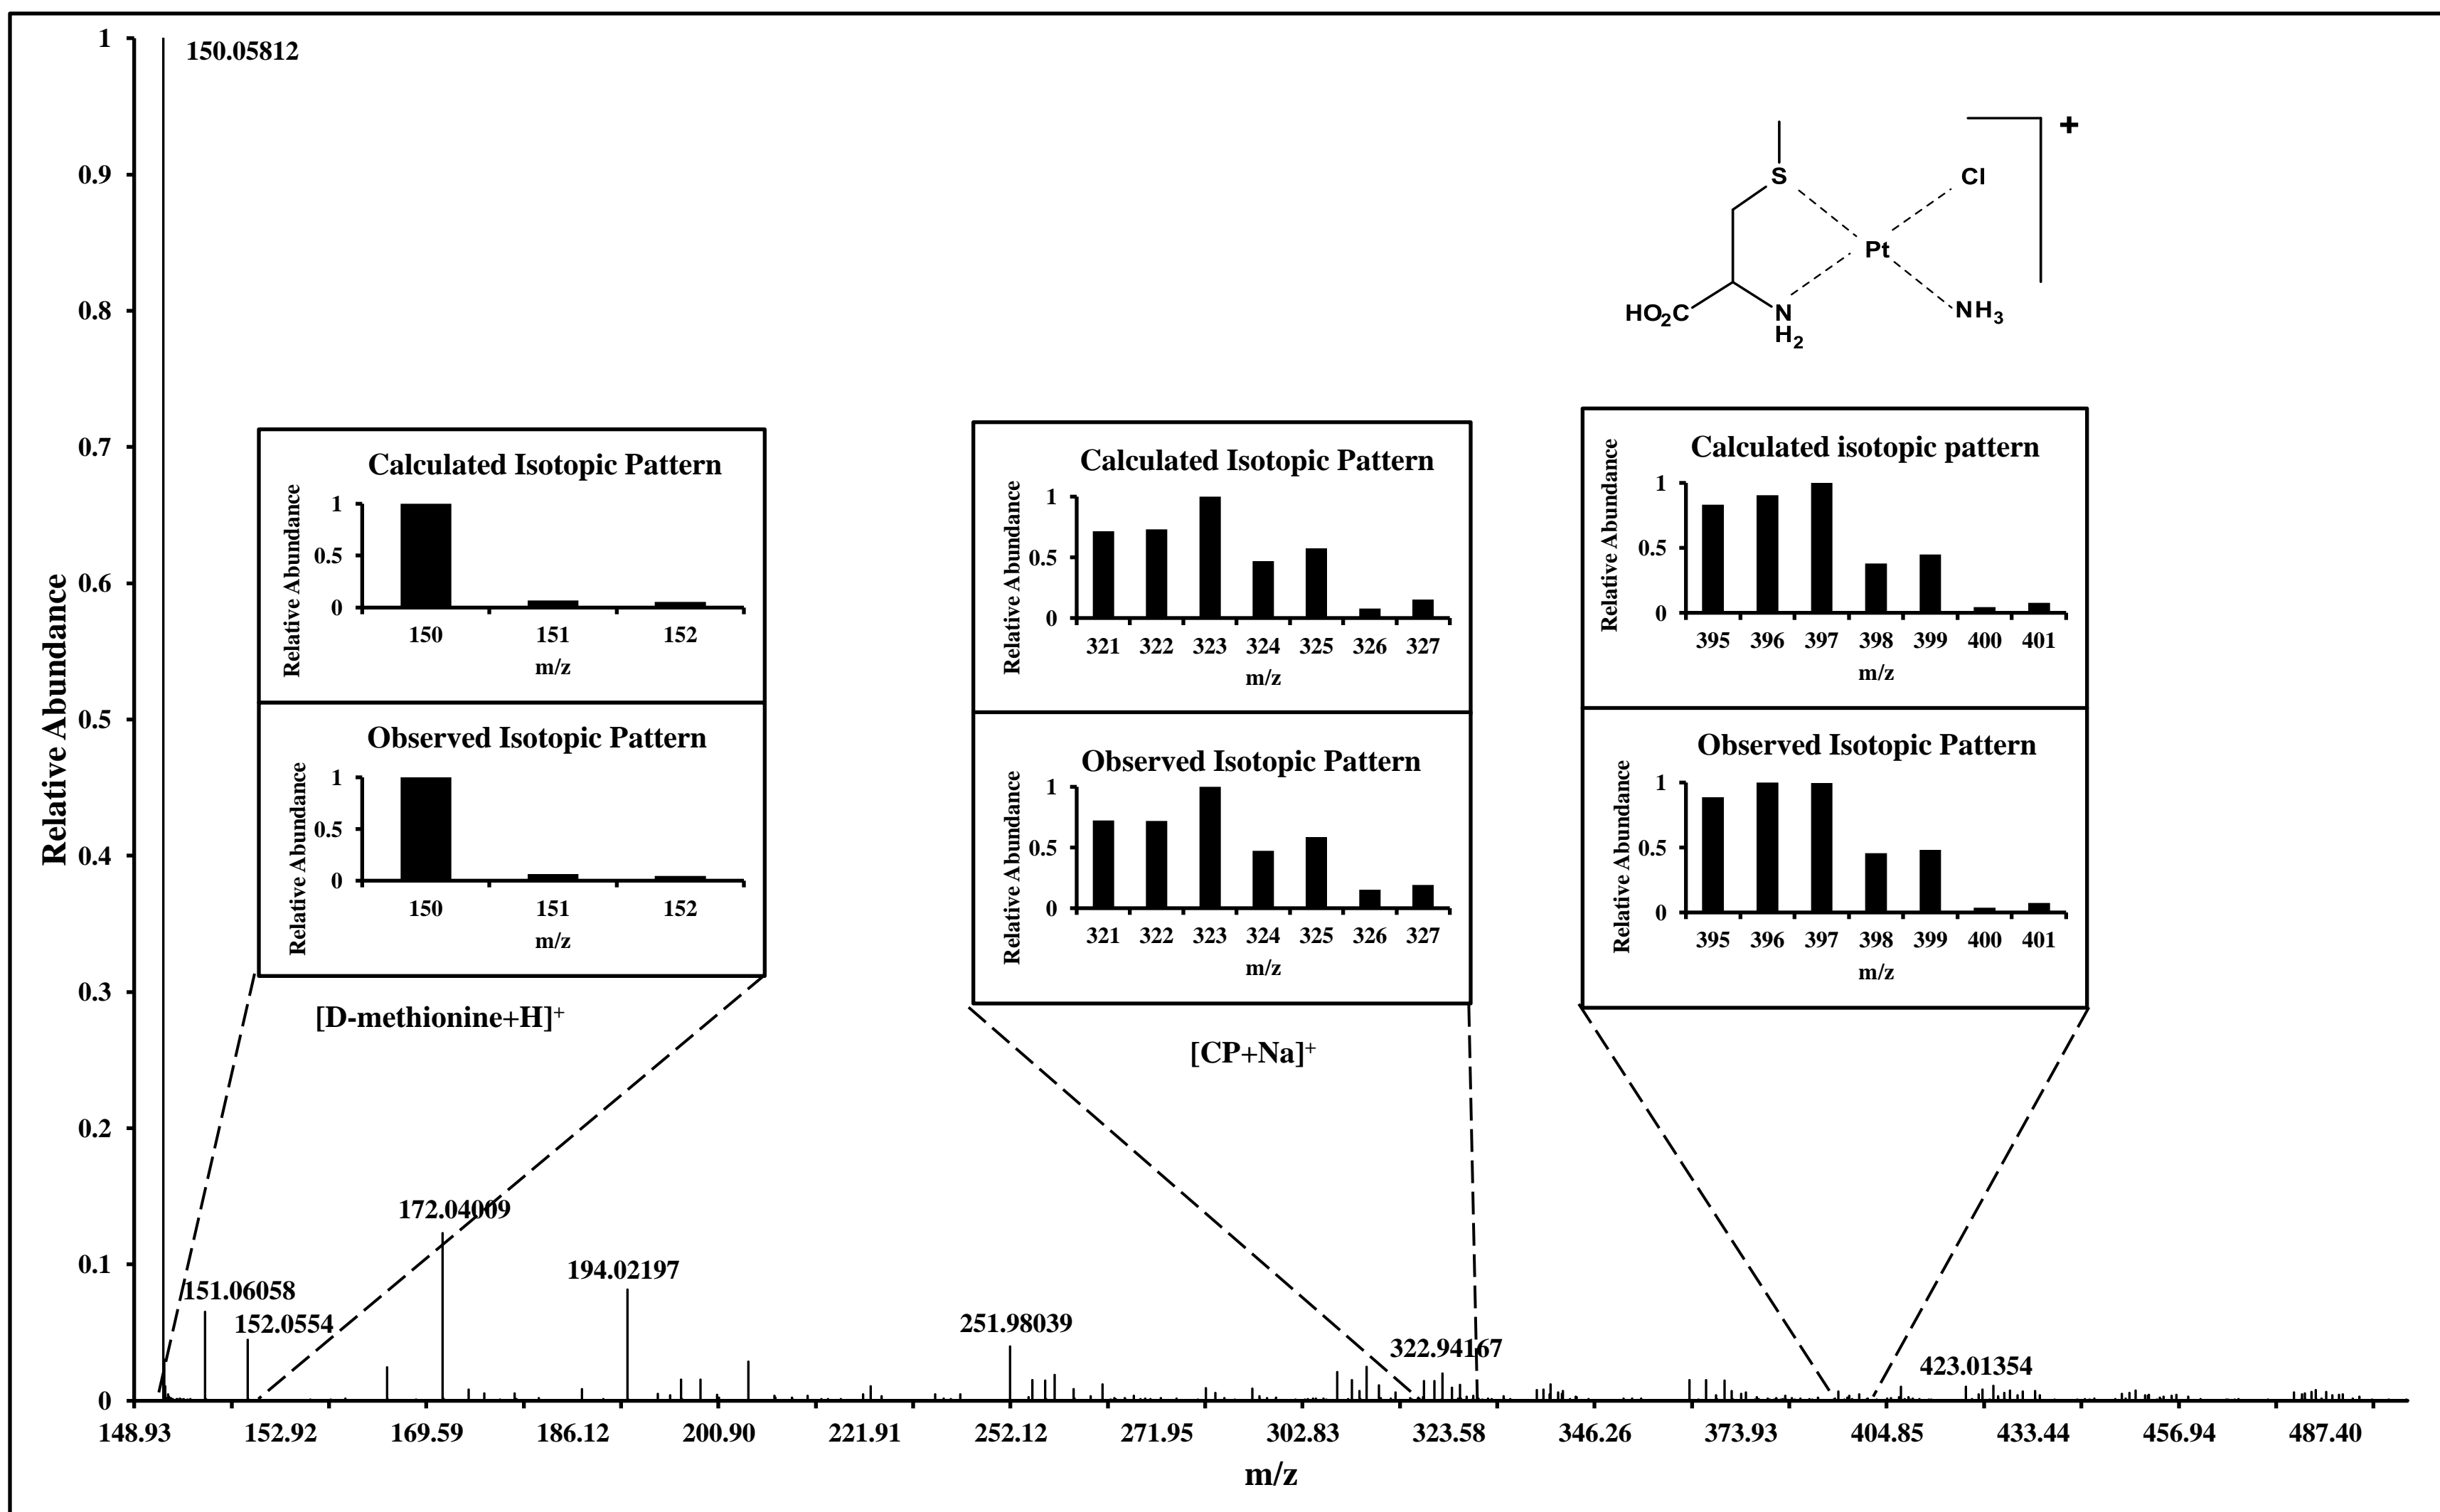

Supplement: c3mt00238a_5.pdf [file c3mt00238a_5.pdf]

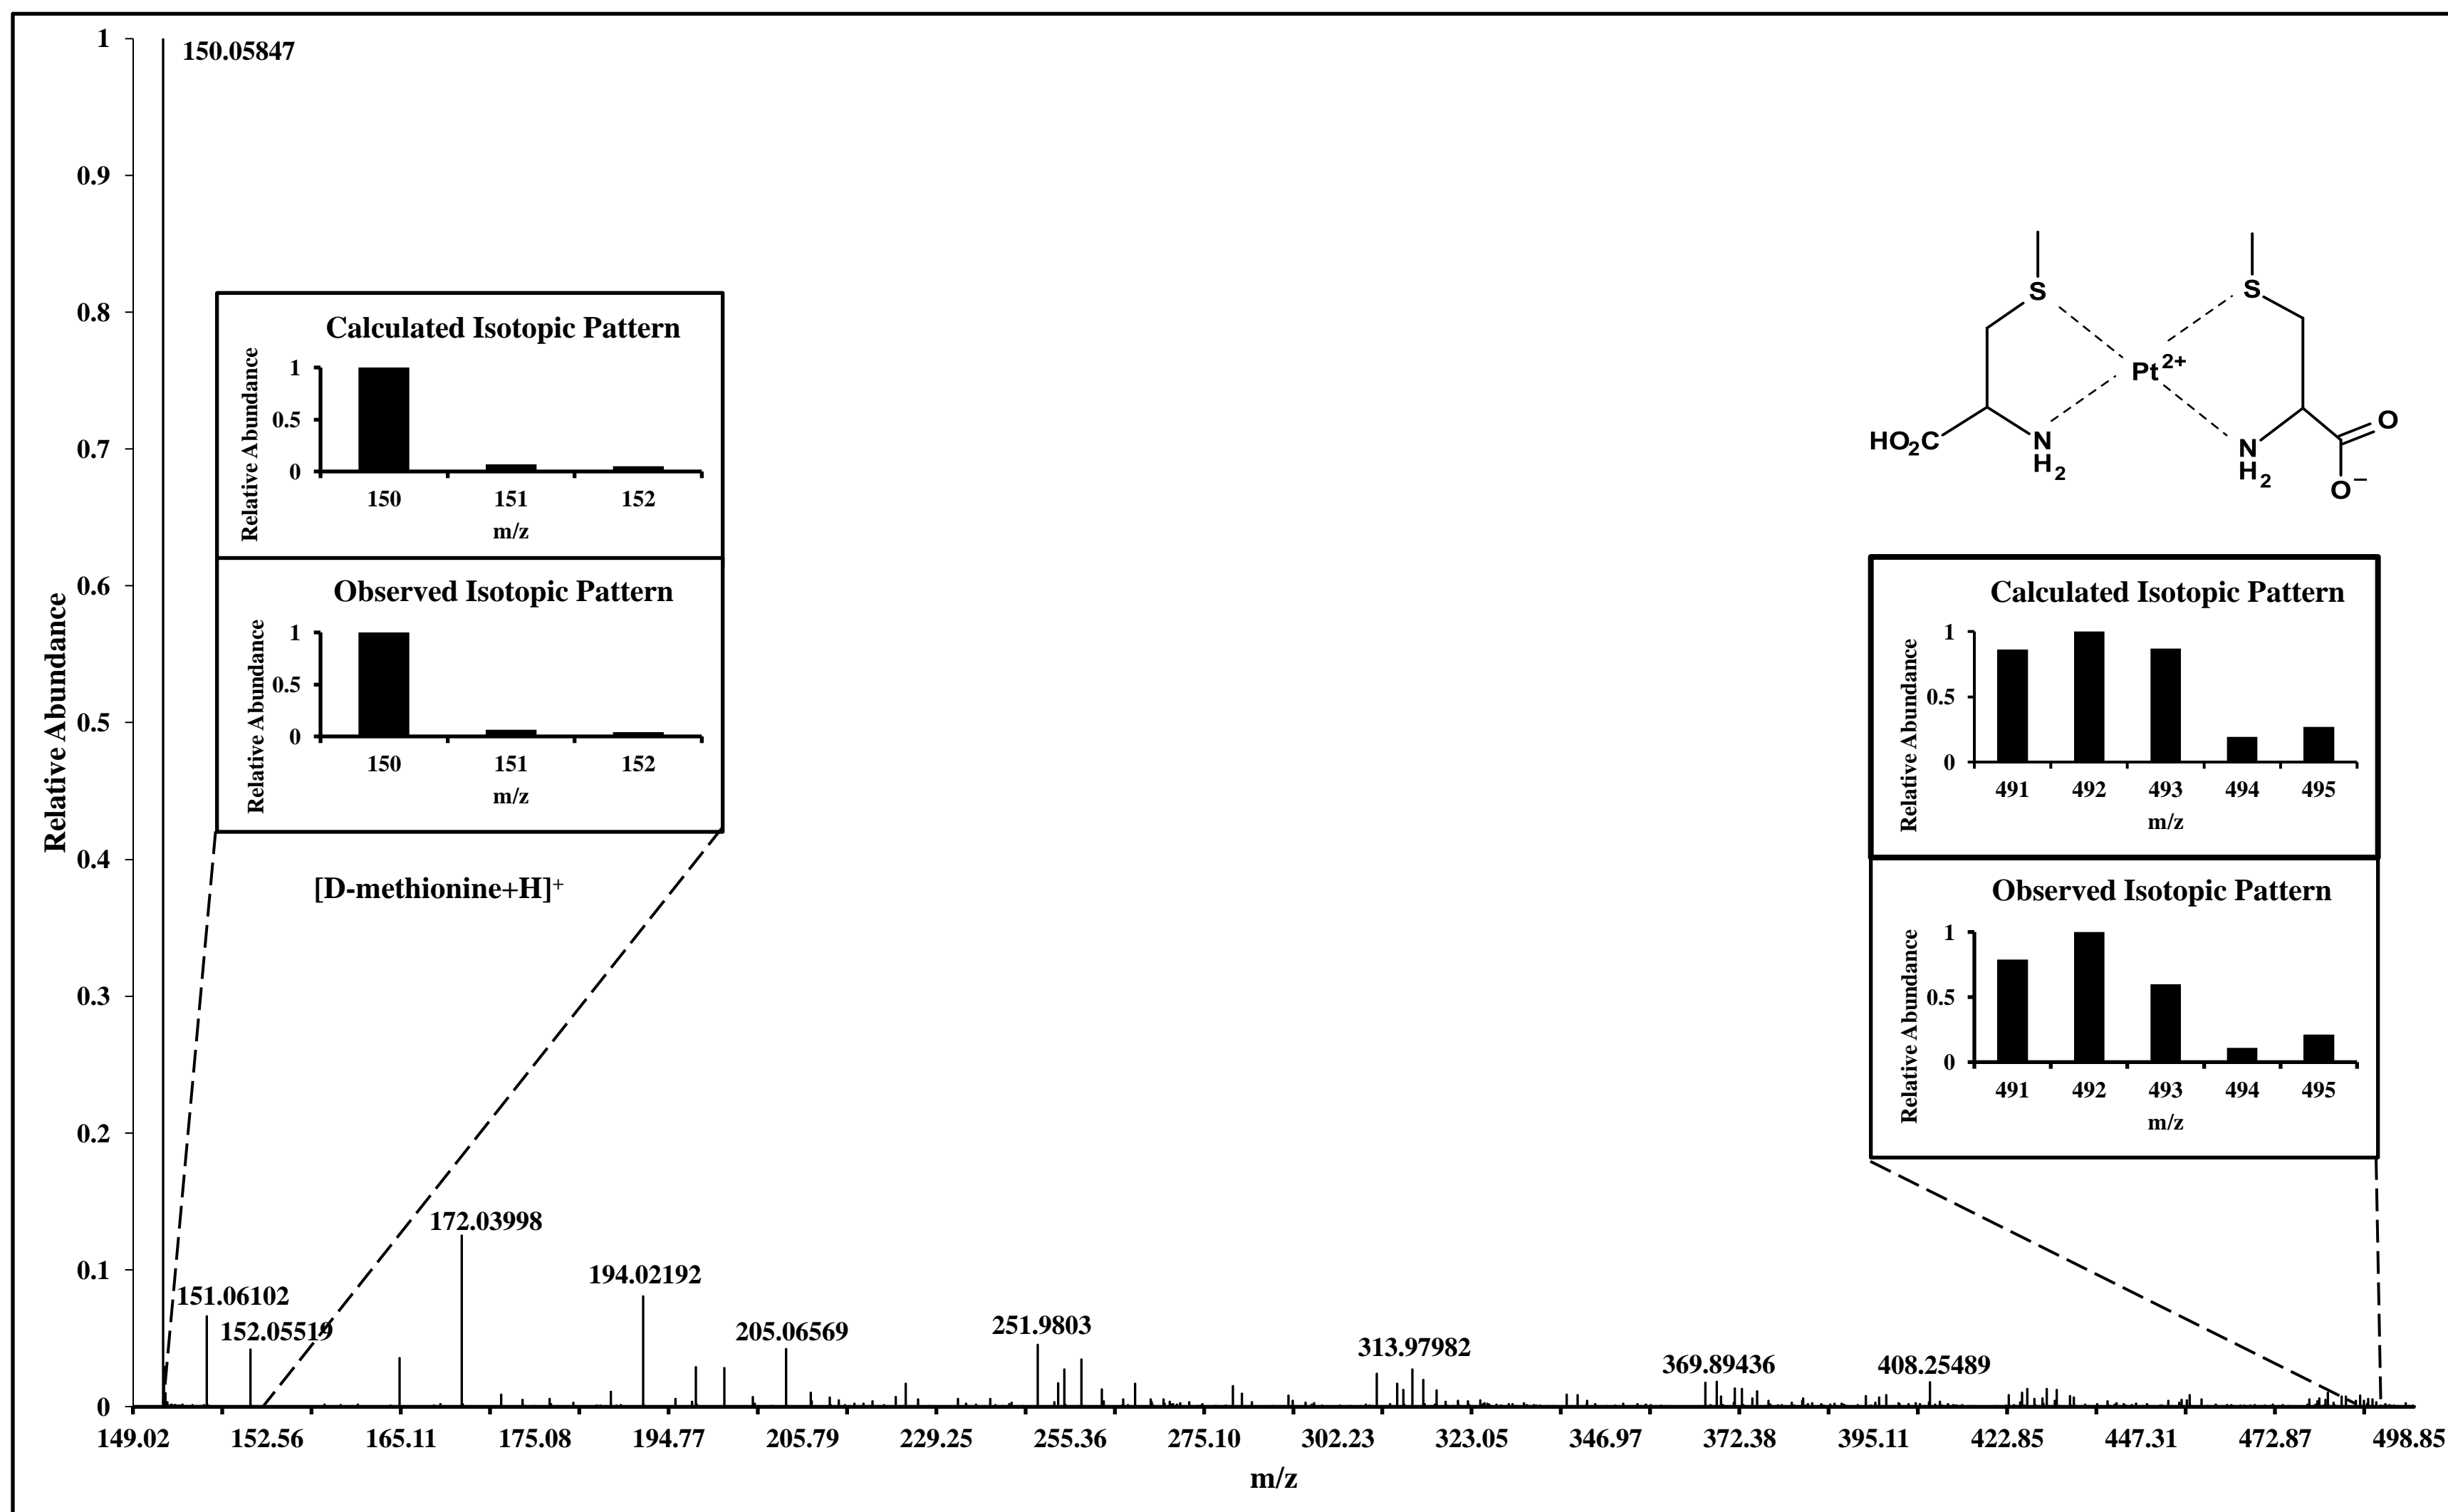

Supplement: c3mt00238a_6.pdf [file c3mt00238a_6.pdf]
